# Supplementary material for: Quantitative assessment of angiogenesis and pericyte coverage in human cell-derived vascular sprouts
Source: PubMed Central journal article supplement (PMC5725907; doi:10.1186/s41232-016-0033-2), 2017-01-18
Supplement: 41232_2016_33_MOESM8_ESM.pdf [file 41232_2016_33_MOESM8_ESM.pdf]

Results from a pilot screen for EC/pericyte sprouts

| Condition           | Number of sprouts<br>(relative to control) | Sprout length<br>(relative to control) | Total pericyte area<br>(relative to control) | Pericyte area fraction<br>(relative to control) |
|---------------------|--------------------------------------------|----------------------------------------|----------------------------------------------|-------------------------------------------------|
| 6-Bnz 10×           | 1.01 ± 0.19 (p=0.935)                      | 0.95 ± 0.07 (p=0.350)                  | 0.84 ± 0.55 (p=0.669)                        | 0.98 ± 0.13 (p=0.834)                           |
| 6-Bnz 100×          | 1.13 ± 0.53 (p=0.715)                      | 0.79 ± 0.47 (p=0.516)                  | 0.62 ± 0.10 (p=0.022)                        | 0.82 ± 0.19 (p=0.240)                           |
| Blebbistatin 10×    | 1.05 ± 0.49 (p=0.869)                      | 1.47 ± 0.21 (p=0.060)                  | 1.83 ± 1.51 (p=0.440)                        | 1.18 ± 0.18 (p=0.226)                           |
| Blebbistatin 100×   | 1.36 ± 0.65 (p=0.433)                      | 0.97 ± 0.34 (p=0.894)                  | 2.26 ± 0.91 (p=0.138)                        | 2.15 ± 0.31 (p=0.023)                           |
| Calpeptin 10×       | 1.03 ± 0.02 (p=0.144)                      | 0.94 ± 0.31 (p=0.770)                  | 0.93 ± 0.40 (p=0.781)                        | 1.20 ± 0.15 (p=0.145)                           |
| Calpeptin 100×      | 1.19 ± 0.37 (p=0.471)                      | 1.11 ± 0.27 (p=0.561)                  | 1.76 ± 0.30 (p=0.049)                        | 1.35 ± 0.07 (p=0.012)                           |
| Calphostin C 10×    | 1.23 ± 0.23 (p=0.219)                      | 1.07 ± 0.09 (p=0.303)                  | 1.37 ± 0.32 (p=0.184)                        | 1.12 ± 0.17 (p=0.352)                           |
| Calphostin C 100×   | 1.38 ± 0.65 (p=0.421)                      | 1.10 ± 0.04 (p=0.042)                  | 2.00 ± 0.87 (p=0.185)                        | 1.26 ± 0.18 (p=0.127)                           |
| Cilostamide 10×     | 0.62 ± 0.27 (p=0.131)                      | 0.79 ± 0.54 (p=0.560)                  | 0.38 ± 0.44 (p=0.136)                        | 0.74 ± 0.21 (p=0.162)                           |
| Cilostamide 100×    | 0.98 ± 0.36 (p=0.915)                      | 0.93 ± 0.33 (p=0.744)                  | 0.95 ± 0.10 (p=0.471)                        | 1.15 ± 0.22 (p=0.344)                           |
| Cyclopamine 10×     | 1.09 ± 0.40 (p=0.730)                      | 1.19 ± 0.23 (p=0.276)                  | 1.04 ± 0.49 (p=0.911)                        | 1.01 ± 0.14 (p=0.924)                           |
| Cyclopamine 100×    | 0.86 ± 0.46 (p=0.647)                      | 1.44 ± 0.53 (p=0.288)                  | 1.05 ± 1.20 (p=0.951)                        | 1.28 ± 0.39 (p=0.350)                           |
| Cytochalasin D 10×  | 1.09 ± 0.32 (p=0.671)                      | 0.45 ± 0.12 (p=0.014)                  | 0.70 ± 0.09 (p=0.028)                        | 1.06 ± 0.06 (p=0.224)                           |
| Cytochalasin D 100× | 1.14 ± 1.02 (p=0.838)                      | 0.42 ± 0.12 (p=0.014)                  | 0.36 ± 0.06 (p=0.003)                        | 0.96 ± 0.41 (p=0.893)                           |
| DAPT 10×            | 1.16 ± 0.38 (p=0.534)                      | 1.22 ± 0.19 (p=0.187)                  | 0.99 ± 0.43 (p=0.985)                        | 0.91 ± 0.21 (p=0.533)                           |
| DAPT 100×           | 0.85 ± 0.62 (p=0.718)                      | 0.69 ± 0.16 (p=0.082)                  | 0.73 ± 0.50 (p=0.458)                        | 1.07 ± 0.42 (p=0.801)                           |
| DDA 10×             | 1.06 ± 0.20 (p=0.637)                      | 1.19 ± 0.06 (p=0.033)                  | 1.61 ± 0.15 (p=0.020)                        | 1.35 ± 0.44 (p=0.304)                           |
| DDA 100×            | 1.19 ± 0.36 (p=0.459)                      | 1.26 ± 0.13 (p=0.076)                  | 1.96 ± 1.45 (p=0.371)                        | 1.49 ± 0.56 (p=0.274)                           |
| EHNA 10×            | 0.96 ± 0.04 (p=0.194)                      | 0.93 ± 0.28 (p=0.707)                  | 1.01 ± 0.37 (p=0.960)                        | 1.09 ± 0.14 (p=0.386)                           |
| EHNA 100×           | 0.84 ± 0.27 (p=0.408)                      | 0.71 ± 0.39 (p=0.324)                  | 0.69 ± 0.55 (p=0.429)                        | 0.98 ± 0.50 (p=0.950)                           |
| Eph inh 6 10×       | 1.33 ± 0.81 (p=0.552)                      | 0.90 ± 0.18 (p=0.442)                  | 1.38 ± 1.15 (p=0.628)                        | 1.14 ± 0.29 (p=0.482)                           |
| Eph inh 6 100×      | 0.72 ± 0.57 (p=0.478)                      | 0.85 ± 0.14 (p=0.212)                  | 0.36 ± 0.28 (p=0.057)                        | 0.68 ± 0.21 (p=0.123)                           |
| Eph inh 9 10×       | 0.80 ± 0.23 (p=0.266)                      | 0.70 ± 0.22 (p=0.141)                  | 0.55 ± 0.09 (p=0.012)                        | 0.82 ± 0.27 (p=0.384)                           |
| Eph inh 9 100×      | 1.10 ± 0.16 (p=0.377)                      | 0.81 ± 0.14 (p=0.134)                  | 0.99 ± 0.73 (p=0.976)                        | 1.04 ± 0.42 (p=0.882)                           |
| Forskolin 10×       | 1.18 ± 0.41 (p=0.523)                      | 1.00 ± 0.24 (p=0.977)                  | 1.39 ± 0.44 (p=0.264)                        | 1.25 ± 0.32 (p=0.303)                           |
| Forskolin 100×      | 1.23 ± 0.39 (p=0.414)                      | 1.02 ± 0.43 (p=0.952)                  | 1.13 ± 0.45 (p=0.660)                        | 1.19 ± 0.37 (p=0.466)                           |
| GM6001 10×          | 0.75 ± 0.55 (p=0.519)                      | 0.61 ± 0.32 (p=0.172)                  | 0.38 ± 0.49 (p=0.158)                        | 0.93 ± 0.89 (p=0.899)                           |
| GM6001 100×         | 1.38 ± 0.22 (p=0.098)                      | 0.65 ± 0.32 (p=0.193)                  | 0.60 ± 0.49 (p=0.294)                        | 1.09 ± 0.23 (p=0.559)                           |
| Gö-6976 10×         | 1.46 ± 0.90 (p=0.470)                      | 0.72 ± 0.16 (p=0.091)                  | 1.16 ± 0.41 (p=0.565)                        | 1.28 ± 0.04 (p=0.006)                           |
| Gö-6976 100×        | 0.94 ± 0.44 (p=0.846)                      | 0.80 ± 0.21 (p=0.235)                  | 1.34 ± 0.82 (p=0.552)                        | 1.62 ± 0.59 (p=0.207)                           |
| Gö-6983 10×         | 0.79 ± 0.25 (p=0.287)                      | 0.67 ± 0.30 (p=0.202)                  | 0.47 ± 0.30 (p=0.093)                        | 0.84 ± 0.27 (p=0.413)                           |
| Gö-6983 100×        | 0.50 ± 0.59 (p=0.276)                      | 0.61 ± 0.25 (p=0.119)                  | 0.31 ± 0.37 (p=0.086)                        | 1.40 ± 0.43 (p=0.242)                           |
| GSK3b inh IX 10×    | 0.99 ± 0.62 (p=0.985)                      | 1.11 ± 0.23 (p=0.519)                  | 0.82 ± 0.43 (p=0.552)                        | 0.77 ± 0.35 (p=0.365)                           |
| GSK3b inh IX 100×   | 0.39 ± 0.04 (p=0.027)                      | 1.47 ± 0.73 (p=0.532)                  | 0.05 ± 0.07 (p=0.035)                        | 0.34 ± 0.48 (p=0.301)                           |
| H-89 10×            | 0.72 ± 0.04 (p=0.008)                      | 1.21 ± 0.33 (p=0.399)                  | 0.73 ± 0.34 (p=0.295)                        | 0.84 ± 0.35 (p=0.508)                           |
| H-89 100×           | 1.11 ± 0.15 (p=0.328)                      | 0.96 ± 0.07 (p=0.442)                  | 0.88 ± 0.57 (p=0.760)                        | 0.84 ± 0.36 (p=0.510)                           |
| H1152 10×           | 1.05 ± 0.15 (p=0.614)                      | 0.97 ± 0.05 (p=0.455)                  | 0.96 ± 0.23 (p=0.767)                        | 0.85 ± 0.11 (p=0.135)                           |
| H1152 100×          | 0.95 ± 0.50 (p=0.874)                      | 1.07 ± 0.04 (p=0.077)                  | 0.99 ± 0.72 (p=0.976)                        | 0.83 ± 0.20 (p=0.278)                           |
| IBMX 10×            | 1.04 ± 0.37 (p=0.863)                      | 1.08 ± 0.28 (p=0.680)                  | 1.16 ± 0.99 (p=0.805)                        | 1.09 ± 0.39 (p=0.732)                           |
| IBMX 100×           | 1.22 ± 0.80 (p=0.685)                      | 0.91 ± 0.47 (p=0.782)                  | 0.72 ± 0.28 (p=0.224)                        | 1.40 ± 0.82 (p=0.491)                           |
| Jasplakinolide 10×  | 1.19 ± 0.75 (p=0.708)                      | 0.91 ± 0.27 (p=0.614)                  | 1.19 ± 0.95 (p=0.761)                        | 0.94 ± 0.03 (p=0.082)                           |
| Jasplakinolide 100× | 0.47 ± 0.64 (p=0.282)                      | 0.22 ± 0.20 (p=0.020)                  | 0.14 ± 0.20 (p=0.017)                        | 0.82 ± 0.94 (p=0.766)                           |

Results from a pilot screen for EC/pericyte sprouts

| Condition          | Number of sprouts<br>(relative to control) | Sprout length<br>(relative to control) | Total pericyte area<br>(relative to control) | Pericyte area fraction<br>(relative to control) |
|--------------------|--------------------------------------------|----------------------------------------|----------------------------------------------|-------------------------------------------------|
| L-NOARG 10×        | 1.00 ± 0.52 (p=0.997)                      | 1.01 ± 0.16 (p=0.890)                  | 0.76 ± 0.19 (p=0.163)                        | 0.75 ± 0.30 (p=0.290)                           |
| L-NOARG 100×       | 0.60 ± 0.26 (p=0.116)                      | 0.87 ± 0.19 (p=0.351)                  | 0.33 ± 0.20 (p=0.029)                        | 0.95 ± 0.31 (p=0.794)                           |
| Latrunculin B 10×  | 0.97 ± 0.91 (p=0.966)                      | 0.69 ± 0.06 (p=0.012)                  | 0.59 ± 0.20 (p=0.068)                        | 1.03 ± 0.19 (p=0.824)                           |
| Latrunculin B 100× | 1.43 ± 1.95 (p=0.739)                      | 0.37 ± 0.33 (p=0.080)                  | 0.77 ± 1.25 (p=0.781)                        | 0.73 ± 0.94 (p=0.669)                           |
| ML-7 10×           | 1.01 ± 0.34 (p=0.963)                      | 0.96 ± 0.09 (p=0.482)                  | 0.97 ± 0.07 (p=0.557)                        | 1.06 ± 0.21 (p=0.648)                           |
| ML-7 100×          | 0.73 ± 0.96 (p=0.680)                      | 0.76 ± 0.18 (p=0.144)                  | 1.07 ± 1.53 (p=0.941)                        | 1.57 ± 0.30 (p=0.080)                           |
| NFκB inh 10×       | 1.35 ± 1.68 (p=0.752)                      | 0.36 ± 0.06 (p=0.003)                  | 0.45 ± 0.55 (p=0.225)                        | 1.34 ± 0.50 (p=0.367)                           |
| NFκB inh 100×      | 0.74 ± 0.64 (p=0.558)                      | 0.56 ± 0.22 (p=0.072)                  | 0.28 ± 0.07 (p=0.003)                        | 1.37 ± 0.68 (p=0.446)                           |
| NKH477 10×         | 0.89 ± 0.35 (p=0.638)                      | 0.70 ± 0.33 (p=0.249)                  | 0.81 ± 0.58 (p=0.632)                        | 0.99 ± 0.31 (p=0.961)                           |
| NKH477 100×        | 1.09 ± 0.52 (p=0.795)                      | 0.51 ± 0.14 (p=0.027)                  | 0.47 ± 0.31 (p=0.097)                        | 0.95 ± 0.69 (p=0.919)                           |
| Nocodazole 10×     | 0.70 ± 1.00 (p=0.660)                      | 0.19 ± 0.14 (p=0.009)                  | 0.15 ± 0.23 (p=0.024)                        | 0.81 ± 0.35 (p=0.446)                           |
| Nocodazole 100×    | 0.91 ± 1.31 (p=0.918)                      | 0.20 ± 0.02 (p=0.000)                  | 0.15 ± 0.14 (p=0.009)                        | 1.08 ± 0.53 (p=0.819)                           |
| PDGFR inh IV 10×   | 0.63 ± 1.01 (p=0.595)                      | 0.54 ± 0.54 (p=0.280)                  | 0.65 ± 1.00 (p=0.605)                        | 1.26 ± 0.96 (p=0.689)                           |
| PDGFR inh IV 100×  | 0.39 ± 0.62 (p=0.231)                      | 0.95 ± 1.55 (p=0.964)                  | 0.10 ± 0.13 (p=0.007)                        | 0.87 ± 1.14 (p=0.865)                           |
| PMA 10×            | 1.13 ± 0.08 (p=0.121)                      | 1.31 ± 0.59 (p=0.461)                  | 2.30 ± 1.46 (p=0.264)                        | 1.37 ± 0.14 (p=0.045)                           |
| PMA 100×           | 1.43 ± 0.70 (p=0.396)                      | 1.26 ± 0.48 (p=0.445)                  | 2.36 ± 1.79 (p=0.319)                        | 1.25 ± 0.24 (p=0.213)                           |
| PP2 10×            | 1.32 ± 0.40 (p=0.302)                      | 0.93 ± 0.16 (p=0.509)                  | 1.01 ± 0.41 (p=0.960)                        | 0.93 ± 0.13 (p=0.436)                           |
| PP2 100×           | 0.76 ± 0.06 (p=0.019)                      | 0.86 ± 0.16 (p=0.271)                  | 0.37 ± 0.07 (p=0.004)                        | 0.80 ± 0.30 (p=0.369)                           |
| Ro-31-8220 10×     | 1.13 ± 0.43 (p=0.652)                      | 0.78 ± 0.25 (p=0.265)                  | 1.05 ± 0.72 (p=0.907)                        | 1.12 ± 0.52 (p=0.723)                           |
| Ro-31-8220 100×    | 1.24 ± 1.02 (p=0.723)                      | 0.45 ± 0.16 (p=0.029)                  | 0.47 ± 0.57 (p=0.246)                        | 0.60 ± 0.62 (p=0.377)                           |
| Rolipram 10×       | 1.07 ± 0.15 (p=0.520)                      | 1.04 ± 0.27 (p=0.842)                  | 1.56 ± 1.24 (p=0.518)                        | 0.98 ± 0.45 (p=0.934)                           |
| Rolipram 100×      | 1.01 ± 0.33 (p=0.951)                      | 1.27 ± 0.82 (p=0.620)                  | 1.05 ± 0.63 (p=0.895)                        | 1.06 ± 0.31 (p=0.784)                           |
| SNAP 10×           | 1.43 ± 0.60 (p=0.342)                      | 1.09 ± 0.11 (p=0.313)                  | 1.32 ± 0.60 (p=0.447)                        | 1.06 ± 0.09 (p=0.372)                           |
| SNAP 100×          | 1.22 ± 0.41 (p=0.449)                      | 1.08 ± 0.25 (p=0.644)                  | 1.34 ± 0.16 (p=0.066)                        | 1.01 ± 0.20 (p=0.933)                           |
| Sp-cAMPS 10×       | 0.81 ± 0.19 (p=0.223)                      | 1.04 ± 0.26 (p=0.816)                  | 0.55 ± 0.54 (p=0.285)                        | 0.58 ± 0.44 (p=0.240)                           |
| Sp-cAMPS 100×      | 1.14 ± 0.21 (p=0.361)                      | 1.37 ± 0.30 (p=0.166)                  | 1.00 ± 0.89 (p=0.997)                        | 0.61 ± 0.55 (p=0.345)                           |
| SQ22536 10×        | 1.07 ± 0.15 (p=0.526)                      | 0.99 ± 0.16 (p=0.918)                  | 1.57 ± 0.18 (p=0.033)                        | 1.20 ± 0.15 (p=0.155)                           |
| SQ22536 100×       | 1.16 ± 0.06 (p=0.042)                      | 1.06 ± 0.26 (p=0.717)                  | 1.11 ± 0.37 (p=0.655)                        | 1.12 ± 0.06 (p=0.075)                           |
| SU5416 10×         | 0.87 ± 0.42 (p=0.645)                      | 0.80 ± 0.13 (p=0.111)                  | 1.27 ± 0.77 (p=0.608)                        | 1.36 ± 0.69 (p=0.462)                           |
| SU5416 100×        | 0.52 ± 0.33 (p=0.128)                      | 0.63 ± 0.24 (p=0.122)                  | 0.22 ± 0.12 (p=0.007)                        | 0.94 ± 0.14 (p=0.543)                           |
| TAPI-1 10×         | 1.66 ± 0.57 (p=0.183)                      | 0.94 ± 0.25 (p=0.722)                  | 1.57 ± 0.35 (p=0.108)                        | 1.19 ± 0.12 (p=0.122)                           |
| TAPI-1 100×        | 1.46 ± 0.28 (p=0.102)                      | 0.94 ± 0.12 (p=0.485)                  | 1.61 ± 0.72 (p=0.278)                        | 1.13 ± 0.55 (p=0.725)                           |
| Taxol 10×          | 1.17 ± 0.91 (p=0.774)                      | 0.49 ± 0.08 (p=0.009)                  | 0.42 ± 0.14 (p=0.018)                        | 1.53 ± 0.68 (p=0.307)                           |
| Taxol 100×         | 0.51 ± 0.44 (p=0.193)                      | 0.46 ± 0.21 (p=0.047)                  | 0.17 ± 0.12 (p=0.007)                        | 1.09 ± 0.47 (p=0.765)                           |
| TGFβ RI inh 10×    | 1.26 ± 0.29 (p=0.261)                      | 1.08 ± 0.23 (p=0.603)                  | 1.56 ± 0.32 (p=0.097)                        | 1.27 ± 0.12 (p=0.062)                           |
| TGFβ RI inh 100×   | 1.76 ± 0.18 (p=0.019)                      | 0.81 ± 0.18 (p=0.216)                  | 1.51 ± 0.74 (p=0.357)                        | 1.08 ± 0.47 (p=0.803)                           |
| Vanadate 10×       | 1.17 ± 0.33 (p=0.470)                      | 1.01 ± 0.14 (p=0.950)                  | 1.17 ± 0.44 (p=0.569)                        | 0.99 ± 0.28 (p=0.949)                           |
| Vanadate 100×      | 1.07 ± 1.63 (p=0.947)                      | 0.26 ± 0.34 (p=0.063)                  | 0.79 ± 1.35 (p=0.813)                        | 0.76 ± 1.18 (p=0.761)                           |
| Y27632 10×         | 1.35 ± 0.32 (p=0.205)                      | 0.85 ± 0.16 (p=0.256)                  | 0.77 ± 0.21 (p=0.190)                        | 0.89 ± 0.22 (p=0.463)                           |
| Y27632 100×        | 1.13 ± 0.14 (p=0.246)                      | 0.88 ± 0.16 (p=0.312)                  | 1.04 ± 0.30 (p=0.845)                        | 0.92 ± 0.18 (p=0.533)                           |
| γ-sec inh X 10×    | 0.73 ± 0.22 (p=0.165)                      | 1.10 ± 0.36 (p=0.678)                  | 0.53 ± 0.31 (p=0.121)                        | 0.59 ± 0.40 (p=0.221)                           |
| γ-sec inh X 100×   | 1.32 ± 0.13 (p=0.048)                      | 0.85 ± 0.34 (p=0.516)                  | 1.37 ± 0.75 (p=0.481)                        | 1.05 ± 0.39 (p=0.831)                           |
